# Supplementary material for: Interactions between Malassezia and New Therapeutic Agents in Atopic Dermatitis Affecting Skin Barrier and Inflammation in Recombinant Human Epidermis Model
Source: MDPI journal article supplement (doi:10.3390/ijms24076171), 2023-03-24
Supplement: s1 [file s1]

# Interactions between *Malassezia* and new therapeutic agents in Atopic Dermatitis affecting skin barrier and inflammation in Recombinant Human Epidermis model

## 1.1. Primer sequence

| Species | Primer name    | Forward (5'-3')             | Reverse (5'-3')            |
|---------|----------------|-----------------------------|----------------------------|
| Human   | IL-1 $\alpha$  | CAG TTC TGC TGA CTG GGT GA  | AGG TGC TGA CCT AGG CTT GA |
|         | IL-4           | CCT CAC AGA GCA GAA GAC TC  | CTC ATG GTG GCT GTA GAA CT |
|         | IL-4R $\alpha$ | AGG TGG GGT CAT AGC AAC AG  | GCA AGC ACA CCT CAT CTC AA |
|         | IL-17          | ACC AAT CCC AAA AGG TCC TC  | GGG GAC AGA GTT CAT GTG GT |
|         | IL-22          | ACA GGT TCT CCT TCC CCA GT  | GGT GAT ATA GGG CTG CTG GA |
|         | CCL17          | TGT GGT CCA GCA GAG AGA TG  | AGG GTG TCC TCT TGG TTC CT |
|         | CCL20          | GCT GCT TTG ATG TCA GTG CT  | GAT GTC ACA GCC TTC ATT GG |
|         | CCL22          | GAA CCT GTG GAA TTG GAG GA  | CTG GAT GAC ACT GAG CTG GA |
|         | TSLP           | CTC TGG AGC ATC AGG GAG AC  | AGG GAA CAT ACG TGG ACA CC |
|         | VEGF           | TGC CCG CTG CTG TCT AAT     | TCT CCG CTC TGA GCA AGG    |
|         | TNF- $\alpha$  | CAC CAC TTC GAA ACC TGG GA  | AGG AAG GCC TAA GGT CCA CT |
|         | IFN- $\gamma$  | GCA GCC AAC CTA AGC AAG AT  | GGG TCA CCT GAC ACA TTC AA |
|         | CERS3          | AGG ACC ACA CCA GGA GAC AC  | AGT GCA AAG TGG GTT GGT TC |
|         | ELOVL1         | ACT TGG GAG AGG AGC ACT CA  | GAG TAA GCA GCC TCC ACA GG |
|         | GAPDH          | GAA GGT GAA GGT CGG AGT CAA | GCT CCT GGA AGA TGG TGA TG |

**Table S1.** Primer sequence

All primers (Table S1) were designed using the coding sequences available on the GenBank database ([http://www.ncbi.nlm.nih.gov/Genbank/Genbank\\_Search.html](http://www.ncbi.nlm.nih.gov/Genbank/Genbank_Search.html)) and were synthesized by Bioneer custom oligo synthesis service (Bioneer, Daejeon, Korea).

## 2.1. Gene expression of AD marker and cell viability of HaCaT cells.

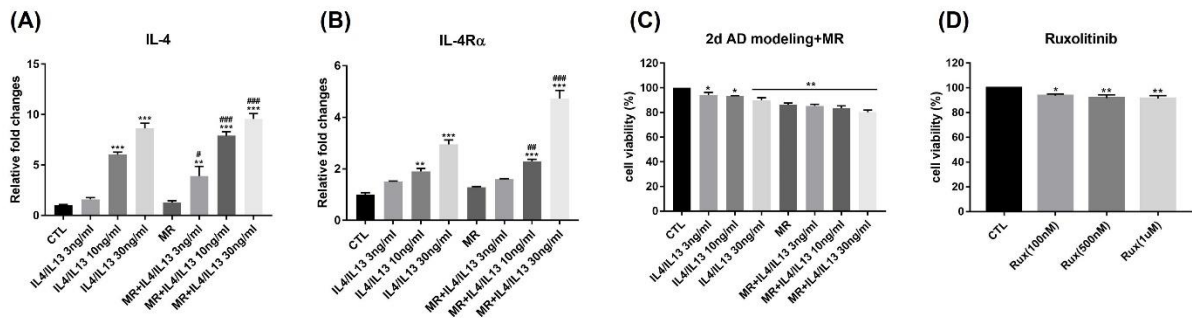

**Figure S1.** Gene expression of AD marker and cell viability of HaCaT cells. The mRNA expression of (A) IL-4 and (B) IL-4Rα was analyzed by RT-PCR. AD marker genes were upregulated by IL-4/IL-13 in concentrations greater than 10ng/ml. Cell viability of (C) AD modeling with *M.restricta*, and (D) ruxolitinib was evaluated by MTT assay. As the concentration of IL-4/IL-13 increases, cell viability was decreased by 80% in the MR-treated groups. Ruxolitinib had a negligible impact on cell viability. Error bars represent the mean  $\pm$  SEM,  $n = 3$ . Statistically significant at \*  $p < 0.05$ , \*\*  $p < 0.01$ , and \*\*\*  $p < 0.001$  compared to the control (CTL) and #  $p < 0.05$ , ##  $p < 0.01$ , and ###  $p < 0.001$  compared to the MR-only treated group (MR).

## 2.2. Analysis of epidermal skin barrier protein and antimicrobial peptides of MR-treated and MR-untreated groups.

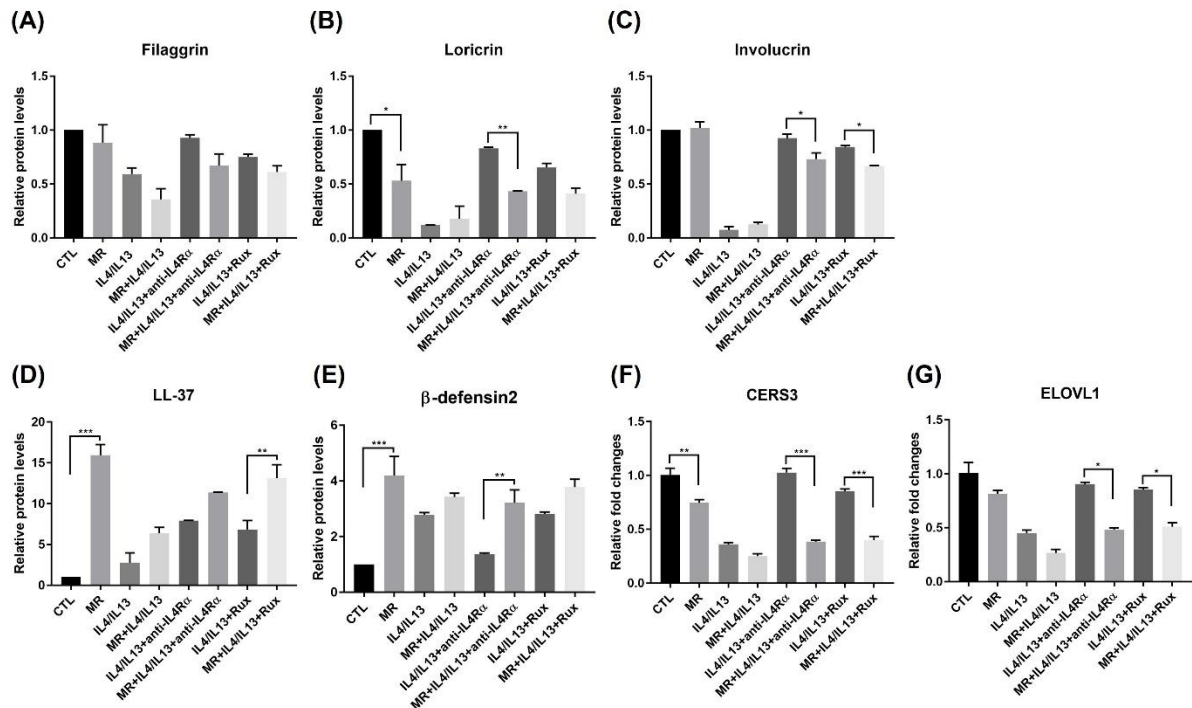

**Figure S2.** Analysis of epidermal skin barrier protein and antimicrobial peptides of MR-treated and MR-untreated groups. The protein expression of (A) FLG, (B) LOR, (C) IVL, (D) LL-37, and (E) β-defensin2 in RHE was measured by western blotting. The mRNA expression of (F) CerS3 and (G)

ELOVL1 in RHE was measured by PCR. Error bars represent the mean  $\pm$  SEM, n = 3. Statistically significant at \* p < 0.05, \*\* p < 0.01, and \*\*\* p < 0.001 compared to each group.

2.3. TEM image of control group.

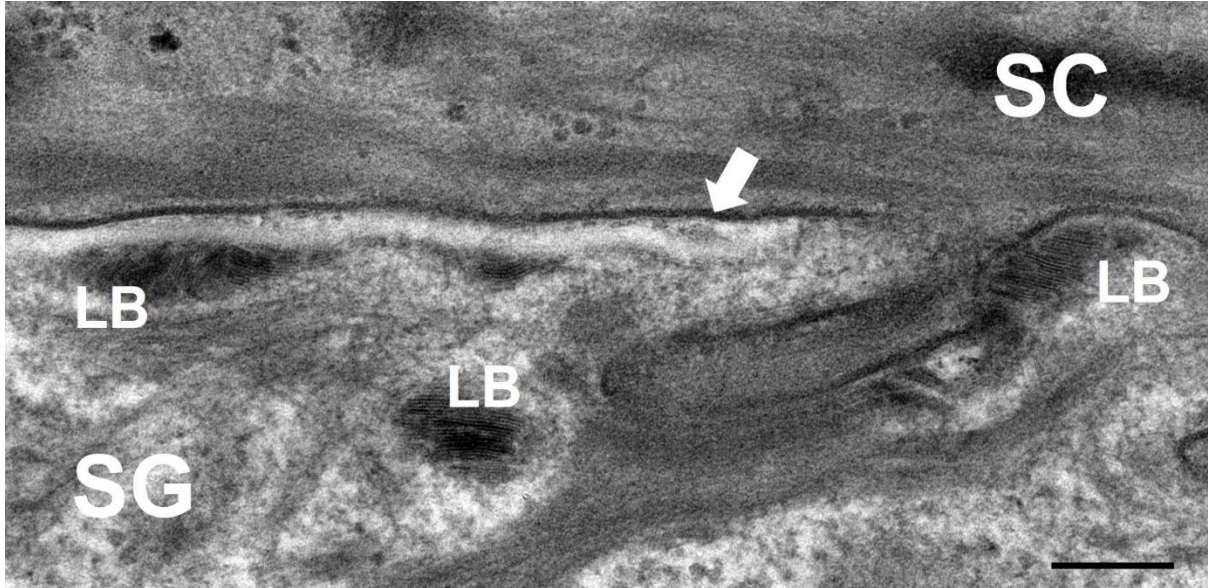

**Figure S3.** TEM image of control group.

The intercellular lipid layer is filled with lipid lamellae, underneath which is located the lamellae body. SC: stratum corneum, SG: stratum granulosum, LB: lamellae body, white arrow: intercellular lipid layer (ILL), Scale bar = 0.2  $\mu$ m

2.4. Analysis of Th1, Th2, and Th17-related gene expression comparison between MR-treated and MR-untreated groups.

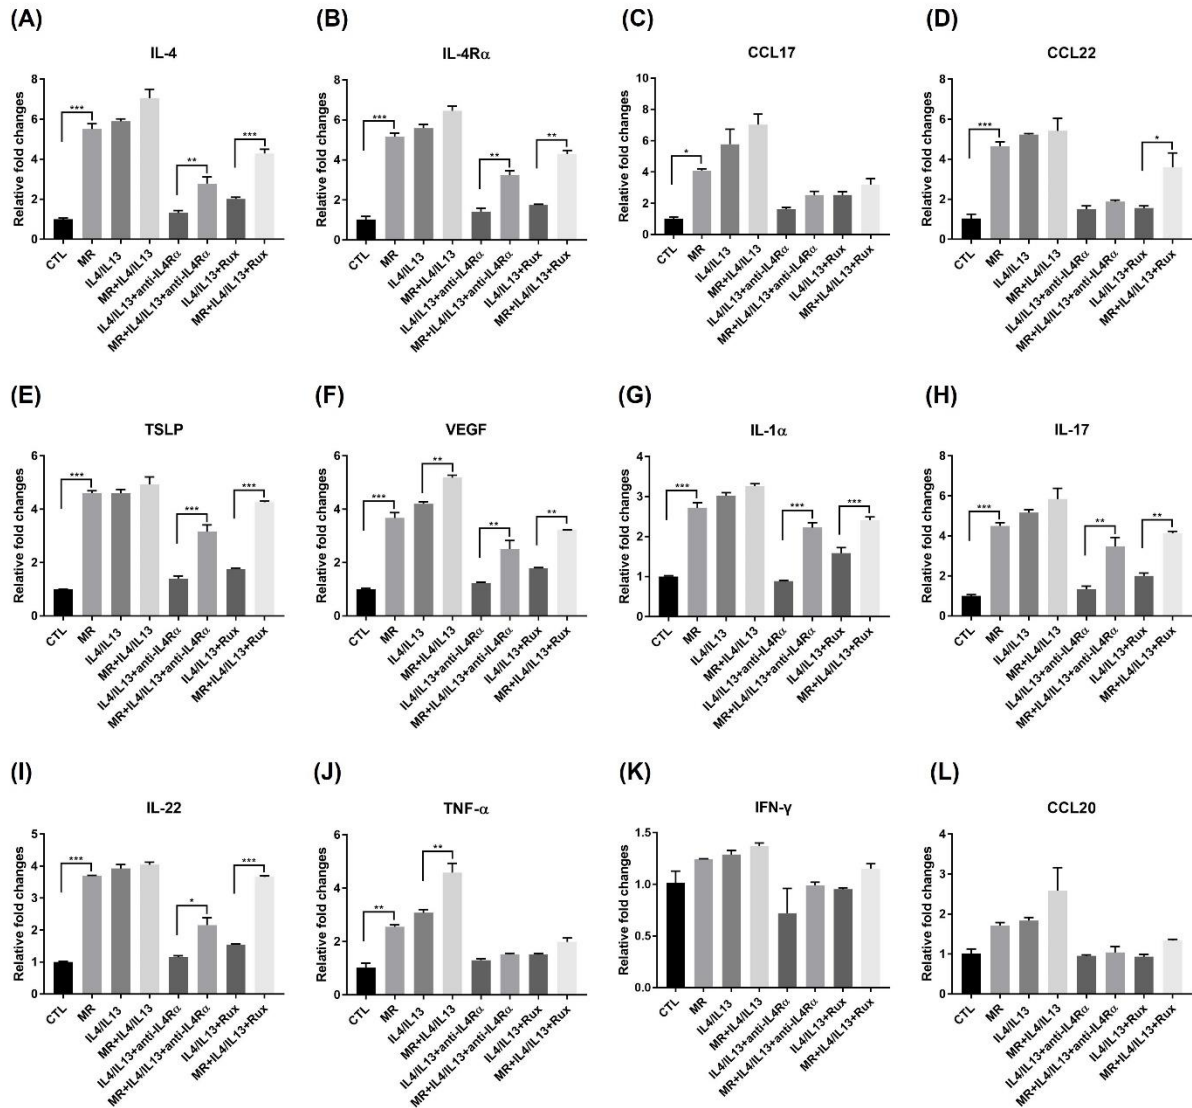

**Figure S4.** Analysis of Th1, Th2, and Th17-related gene expression comparison between MR-treated and MR-untreated groups. The mRNA expression of (A) IL-4, (B) IL-4Rα, (C) CCL17, (D) CCL22, (E) TSLP (F) VEGF, (G) IL-1α, (H) IL-17, (I) IL-22, (J) TNF-α, (K) IFN-γ (L) CCL20 in RHE by RT-PCR. Error bars represent the mean  $\pm$  SEM, n = 3. Statistically significant at \* p < 0.05, \*\* p < 0.01, and \*\*\* p < 0.001 compared to each group.

## 2.5. Analysis of Th2, Th17 related proteins comparison between MR-treated and MR-untreated groups.

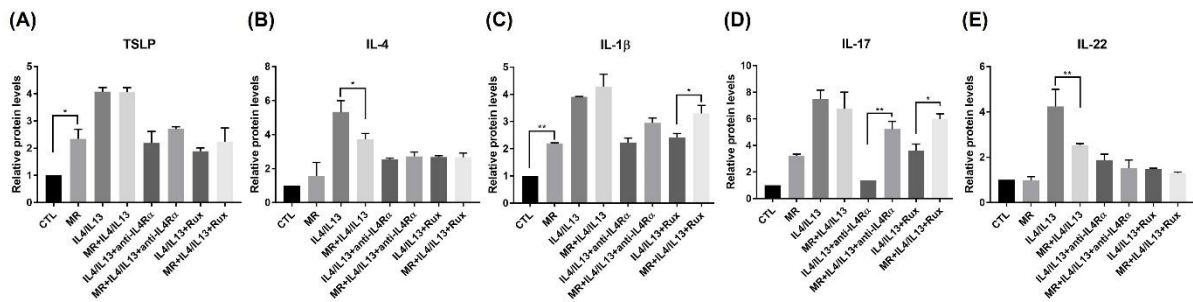

**Figure S5.** Analysis of Th2, Th17 related proteins comparison between MR-treated and MR-untreated groups. The protein levels of (A) TSLP, (B) IL-4, (C) IL-1 $\beta$ , (D) IL-17, and (E) IL-22 in RHE were measured by western blotting. Error bars represent the mean  $\pm$  SEM, n = 3. Statistically significant at \* p < 0.05 and \*\* p < 0.01 compared to each group.

## 2.6. Analysis of protein levels of JAK/STAT pathway-related molecules comparison in MR-treated and MR-untreated groups.

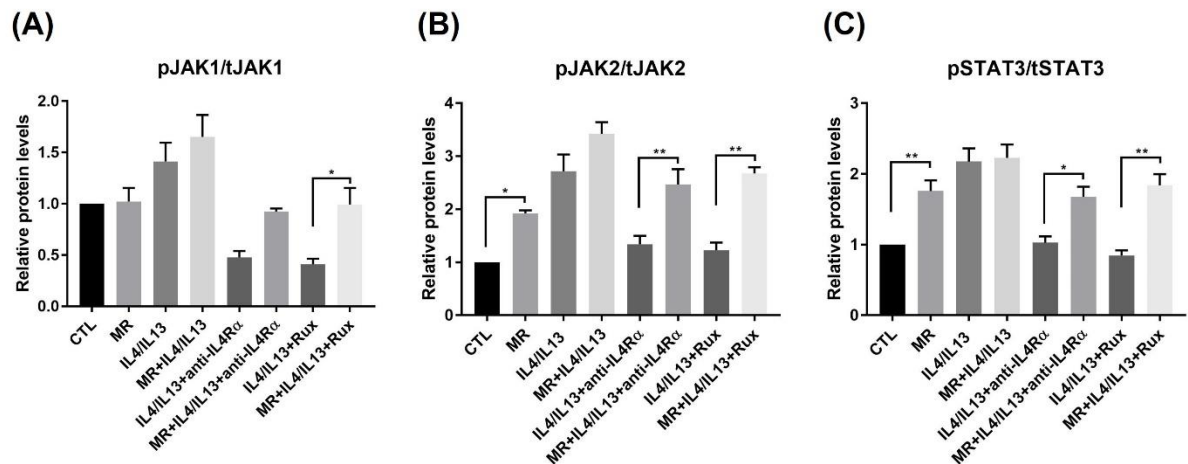

**Figure S6.** Analysis of protein levels of JAK/STAT pathway-related molecules comparison in MR-treated and MR-untreated groups. The protein expression of (A) pJAK1/tJAK1, (B) pJAK2/tJAK2, and (C) pSTAT3/tSTAT3 in RHE measured by western blotting. Error bars represent the mean  $\pm$  SEM, n = 3. Statistically significant at \* p < 0.05, and \*\* p < 0.01 compared to each group.
